# Supplementary material
Source: publisher figshare collection journal article supplement (https://future-science-group.figshare.com/ndownloader/files/28532793)
Supplement: Supplementary file 1 [file 28532793]

**Supplementary table 1 Cox regression analysis for overall survival among patients with cervical small cell or squamous cell carcinoma after PSM**

| **Covariate, level** | **Crude HR (95% CI)** | **P value** | **Adjusted HR (95% CI)** | **P value** |
| --- | --- | --- | --- | --- |
| **Histology** |  |  |  |  |
| squamous cell carcinoma | 1 |  | 1 |  |
| Small cell carcinoma | 2.90 (2.51-3.36) | **<0.001** | 1.87 (1.57-2.23) | **<0.001** |
| **Age (years)** |  |  |  |  |
| 18-39 | 1 |  | 1 |  |
| 40-59 | 1.68 (1.39-2.04) | **<0.001** | 1.14 (0.93, 1.40) | 0.197 |
| ≥60 | 2.43 (1.97-2.98) | **<0.001** | 1.58 (1.27, 1.97) | **<0.001** |
| **Marital status** |  |  |  |  |
| Married | 1 |  |  |  |
| Single | 1.07 (0.92-1.26) | **0.386** | 0.89 (0.75, 1.04) | 0.150 |
| Unknown | 0.88 (0.61-1.27) | **0.500** | 0.92 (0.63, 1.34) | 0.669 |
| **Race** |  |  |  |  |
| Black | 1 |  | 1 |  |
| White | 0.79 (0.65-0.96) | **0.017** | 0.84 (0.69, 1.02) | 0.076 |
| Other | 0.74 (0.56-0.99) | **0.041** | 2.21 (1.40, 3.48) | **0.007** |
| **Grade** |  |  |  |  |
| Grade I-II | 1 |  | 1 |  |
| Grade III-IV | 1.35 (1.01-1.80) | **0.041** | 1.95 (0.80, 4.76) | 0.141 |
| Unknown | 1.07 (0.83 -1.37) | 0.610 | 1.57 (0.64, 3.83) | 0.325 |
| **Stage** |  |  |  |  |
| I | 1 |  |  |  |
| II | 2.13 (1.38,3.27) | **0.001** | 2.21 (1.40, 3.48) | **0.001** |
| III | 2.93 (2.19,3.92) | **<0.001** | 3.46 (2.51, 4.77) | **<0.001** |
| IV | 8.72 (6.60,11.53) | **<0.001** | 8.17 (5.95, 11.21) | **<0.001** |
| Unknown | 2.96 (1.92,4.57) | **<0.001** | 2.21 (1.38, 3.53) | **0.001** |
| **Surgery** |  |  |  |  |
| None/unknown | 1 |  | 1 |  |
| Performed | 0.38 (0.32-0.45) | **<0.001** | 0.63 (0.50, 0.79) | **<0.001** |
| **Pelvic lymphadenectomy** |  |  |  |  |
| Not performed |  |  | 1 |  |
| Performed | 0.47 (0.39-0.56) | **<0.001** | 0.78 (0.62, 0.99) | **0.038** |
| Unknown | 0.98 (0.58-1.67) | **0.953** | 0.99 (0.55, 1.75) | 0.962 |
| **Radiotherapy** |  |  |  |  |
| None/unknown | 1 |  | 1 |  |
| Performed | 0.86 (0.73-1.00) | **0.056** | 0.73 (0.60, 0.88) | **0.001** |
| **Chemotherapy** |  |  |  |  |
| None/unknown | 1 |  | 1 |  |
| Performed | 1.43 (1.16-1.75) | **0.001** | 0.65 (0.50, 0.83) | **0.001** |

HR：hazard ratio； 95% CI：95% confidence interval
